# Supplementary material
Source: Research Square preprint supplement (doi:10.21203/rs.3.rs-9681484/v1)
Supplement: Supplementary file 1 [file 3aa17ee46bc39bb5babcd652.docx]

**Supplementary data**

1. Rarefraction Analysis

Rarefaction analysis showed that all sample curves flattened, confirming that the dataset effectively captured soil microbial diversity (Fig. 1).


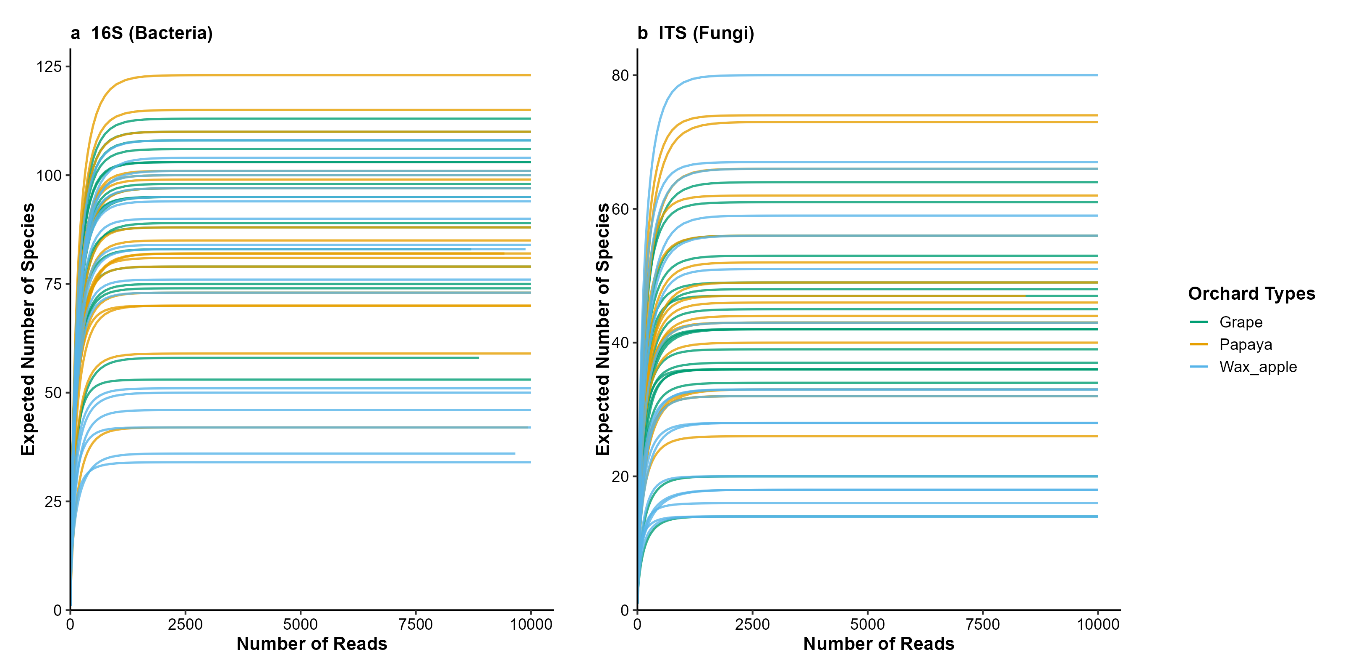


Figure 1. Rarefaction curves of microbial species richness from three orchard types (Grape, Papaya, and Wax apple) across Taiwan. All 55 soil samples exhibit a saturation plateau in both (A) the bacterial 16S rRNA gene and (B) the ITS fungal datasets, indicating sufficient sequencing coverage to capture microbial diversity.

1. Betadiversity statistic summary

Table 1.

| Dataset | Comparison | PERMANOVA_R2 | PERMANOVA_F | PERMANOVA_p | Betadisper_F | Betadisper_p |
| --- | --- | --- | --- | --- | --- | --- |
| 16S | Orchard Type | 0.101214 | 2.927897 | 0.001 | 3.666 | 0.039 |
| 16S | *C. tropicalis* Presence | 0.026983 | 1.469777 | 0.071 | 0.429004 | 0.519 |
| 16S | Azole Presence | 0.017391 | 0.938043 | 0.494 | 5.471034 | 0.025 |
| 16S | *C. tropicalis* Clade | 0.017833 | 0.962295 | 0.432 | 0.240116 | 0.624 |
| ITS | Orchard Type | 0.114429 | 3.359575 | 0.001 | 5.627715 | 0.004 |
| ITS | *C. tropicalis* Presence | 0.015968 | 0.860011 | 0.73 | 0.053365 | 0.832 |
| ITS | Azole Presence | 0.018649 | 1.007197 | 0.403 | 10.70315 | 0.001 |
| ITS | *C. tropicalis* Clade | 0.01447 | 0.778164 | 0.86 | 0.159155 | 0.685 |

Table 3. FAPROTAX and FUNGuild LefSe result

| Kingdom | Taxon Function | Enriched_group | LDA score | P_value | Grape_mean | Papaya_mean | Wax_apple_mean |
| --- | --- | --- | --- | --- | --- | --- | --- |
| Bacteria | fermentation | Grape | 3.17 | 2.44E-02 | 1487.5 | 672.8 | 477 |
| Bacteria | iron_respiration | Grape | 3.1 | 3.41E-02 | 1265.9 | 321.8 | 762.3 |
| Bacteria | methanol_oxidation | Papaya | 2.43 | 4.00E-02 | 0 | 267.4 | 18.4 |
| Fungi | Endophyte-Plant Saprotroph-Undefined Saprotroph | Grape | 4.1 | 4.03E-02 | 12562.6 | 7274.3 | 4217.6 |
| Fungi | Unassigned | Papaya | 3.96 | 1.41E-03 | 2638.7 | 9100.4 | 2889.8 |
| Fungi | Animal Pathogen-Endophyte-Epiphyte-Fungal Parasite-Plant Pathogen-Wood Saprotroph | Wax_apple | 3.85 | 3.77E-03 | 5155.4 | 798.1 | 7116.6 |
| Fungi | Animal Pathogen-Endophyte-Plant Pathogen-Plant Saprotroph-Undefined Saprotroph-Wood Saprotroph | Wax_apple | 3.84 | 1.29E-03 | 11.7 | 0 | 6924.9 |
| Fungi | Animal Pathogen-Dung Saprotroph-Endophyte-Epiphyte-Plant Saprotroph-Wood Saprotroph | Papaya | 3.63 | 2.61E-06 | 151.2 | 4249.8 | 1503.8 |
| Fungi | Plant Saprotroph-Undefined Saprotroph | Grape | 3.56 | 3.35E-05 | 3613.2 | 578.5 | 262.4 |
| Fungi | Wood Saprotroph | Grape | 3.53 | 1.85E-02 | 3382.3 | 452.9 | 293.7 |
| Fungi | Animal Parasite-Dung Saprotroph-Endophyte-Fungal Parasite-Plant Pathogen-Undefined Saprotroph-Wood Saprotroph | Papaya | 3.5 | 4.46E-02 | 1666.7 | 3170.7 | 837.4 |
| Fungi | Plant Pathogen | Grape | 3.49 | 3.21E-02 | 3098.1 | 2109.6 | 3079.6 |

Table 3. Primer list of *Candida tropicalis* and clade 4 detection

| Table S3. The Primers Used in This Study | | | | |
| --- | --- | --- | --- | --- |
| Name | Genes | Sequences | Position* | Reference number |
| rDNA | | | | |
| ITS1 | ITS | TCCGTAGGTGAACCTGCGG |  | (15) |
| ITS4 | ITS | TCCTCCGCTTATTGATATGC |  | (15) |
| NL1 | D1/D2 | GCATATCAATAAGCGGAGGAAAAG |  | (15) |
| NL4 | D1/D2 | GGTCCGTGTTTCAAGACGG |  | (15) |
| MLST | | | | |
| HJL2796 | *ICL1-F* | CAACAGATTGGTTGCCATCAGAGC | +675 – +698 | (52) |
| HJL2797 | *ICL1-R* | CGAAGTCATCAACAGCCAAAGCAG | +1412 – +1435 | (52) |
| HJL2799 | *MDR1-F* | GGCTGGAGATGGACTTTTTGG | +772 – +792 | (53) |
| HJL2800 | *MDR1-R* | TGGAGCACCAAACAATGGG | +1491 – +1509 | (53) |
| HJL2801 | *SAPT2-F* | CACAGAAACGCCTCCGTTTTG | -46 – -26 | (53) |
| HJL2803 | *SAPT2-R* | CACTGGTAGCTGAAGGAG | +728 – +745 | (53) |
| HJL2804 | *SAPT4-F* | TACCCATTGGAATGTATTGTTGA | -103 – -81 | (53) |
| HJL2805 | *SAPT4-R* | CCAGTTGTTGAATCTGATGAATT | +637 – +659 | (53) |
| HJL2807 | *XYR1-F* | CCAACAACTATAAAGAGATCGACA | -84 – -61 | (53) |
| HJL2808 | *XYR1-R* | GCAAGTATGGGTGATGTTCAAT | +580 – +601 | (53) |
| HJL2811 | *ZWF1a-F* | GTCWTATGATTCMTTYGGWGA | +3 – +23 | (53) |
| HJL2812 | *ZWF1a-R* | GARACTGGTCTTTCCATRGT | +751 – +770 | (53) |
| *Position of translational initiation site of ATG as +1 | | | | |
